# Supplementary material
Source: publisher figshare collection journal article supplement (https://gsapubs.figshare.com/ndownloader/files/23306135)
Supplement: Supplementary file 1 [file 23306135]

GSA Data Repository Item 2017372

Tohver, E., Schmieder, M., Lana, C., Mendes, P.S.T., Jourdan, F., Warren, L., and Riccomini, C., 2017, End-Permian impactogenic earthquake and tsunami deposits in the intracratonic Paraná Basin of Brazil: GSA Bulletin, <https://doi.org/10.1130/B31626.1>.

## **DATA REPOSITORY**

**Supplementary Figure.** Cathodoluminescent images of the SHRIMP mounts used for U/Pb geochronology. Individual analyses are named and numbered according to Table 2. Red arrows indicate the 12 grains that form the c.253 Ma detrital population.
